1 **Adipocyte lipolysis abrogates skin fibrosis in a Wnt/DPP4-dependent manner**

2

3 Inhibition of adipocyte lipolysis promotes fibrosis.

4

5 <sup>1</sup>Jussila, A.#, <sup>2</sup>Caves E.#, <sup>1</sup>Zhang B., <sup>1</sup>Kirti, S. <sup>1</sup>Steele, M.; <sup>2</sup>Lei, V. <sup>1</sup>Hamburg-Shields, E.;

6 <sup>3</sup>Lydon, J. ,<sup>3</sup>Ying, Y., <sup>4</sup>Lafyatis, R, <sup>5</sup>Rajagopalan, S., <sup>2</sup>Horsley, V.\* , <sup>1,6,7</sup>Atit, R.P.\*

7

8 <sup>1</sup>Dept. of Biology, Case Western Reserve University, Cleveland, Ohio, USA

9 <sup>2</sup>Dept. of Molecular and Cell Biology, Yale University, New Haven, Connecticut, USA

10 <sup>3</sup>Dept. of Molecular and Cellular Biology, Baylor College of Medicine, Houston, Texas,  
11 USA

12 <sup>4</sup> Department of Medicine, Division of Rheumatology and Clinical Immunology, Pittsburgh,  
13 Pennsylvania, USA

14 <sup>5</sup>Division of Cardiovascular Medicine, University Hospitals, Harrington Heart and  
15 Vascular Institute (HHVI), and Case Cardiovascular Research Institute, Department of  
16 Internal Medicine and Radiology Case Western Reserve University, Cleveland, OH

17 <sup>6</sup>Dept. of Genetics and Genome Sciences, <sup>7</sup>Depts of Dermatology, Case Western  
18 Reserve University, Cleveland, OH

19

20 \* Corresponding Senior Authors

21 # Co-First Authors

22 **Tissue fibrosis in many organs results from altered and excessive extracellular**  
23 **matrix (ECM) protein deposition**<sup>1</sup>. **Concomitant with ECM expansion, resident lipid-**  
24 **filled cells including mature adipocytes are lost in human and mouse fibrosis**<sup>2-5</sup>,  
25 **yet the mechanisms that drive mature adipocyte lipid loss and their contribution to**  
26 **tissue fibrosis are unknown. Here, we identify an early, fibro-protective role of**  
27 **mature adipocyte lipolysis driven by Wnt signaling during fibrosis onset. Using**  
28 **chemical and genetic mouse models of skin fibrosis, we show that fibrotic stimuli**  
29 **induce and maintain lipolysis in mature dermal adipocytes. Loss of the lipolytic**  
30 **rate-limiting enzyme adipocyte triglyceride lipase (ATGL)**<sup>6,7</sup> **in murine dermal**  
31 **adipocytes exacerbates bleomycin-induced fibrosis development. Adipocyte**  
32 **lipolysis is stimulated in the early stages of Wnt signaling-induced skin fibrosis**  
33 **and by Wnt agonists *in vitro*. Furthermore, deletion or inhibition of the Wnt target**  
34 **gene, CD26/Dipeptidyl peptidase 4 (DPP4) prevented Wnt-induced lipolysis and**  
35 **skin fibrosis in mice. Notably, DPP4 expression correlates with skin fibrosis**  
36 **severity in human patients. Thus, we propose that adipocyte-derived fatty acids**  
37 **and the Wnt-DPP4 axis act as essential regulators of ECM homeostasis within**  
38 **tissues and provide a therapeutic avenue to manipulate fibrosis.**

39  
40 Excessive deposition of ECM proteins leads to scarring or fibrosis, inducing tissue  
41 stiffening and loss of function in virtually all organ systems, including the skin, adipose  
42 tissue, heart, intestine, and lung<sup>1</sup>. Despite its devastating impact on nearly 5% of people  
43 worldwide annually<sup>8</sup>, no effective treatment for fibrosis exists. Interestingly, fibrosis occurs  
44 concomitantly with a loss of lipid-filled cells in several organs including mature adipocytes  
45 in the skin and lipo-fibroblasts in the lung and liver<sup>2-5</sup>.

46  
47 In the skin, adipocytes compose a distinct layer of dermal white adipose tissue (DWAT)  
48 under the skin's ECM-rich dermal layers, making the skin an excellent system in which to  
49 study how lipid-filled cells impact fibrosis development. Accumulation and breakdown of  
50 lipids in adipocytes are regulated by the tightly controlled balance between *de novo*  
51 lipogenesis, uptake, and breakdown of lipids including lipolysis, lipophagy, and exosomal  
52 release of intact lipid<sup>9-11</sup> (Extended data FigS1.1). We and others have shown that a  
53 subset of mature adipocytes undergo dedifferentiation and form myofibroblasts after  
54 injury and in bleomycin-induced skin fibrosis in mice<sup>12,13</sup>. In skin repair, this fate transition  
55 requires lipolysis and loss of lipid droplets in mature adipocytes in an adipocyte  
56 triglyceride lipase (*Atgl*)-dependent manner<sup>14</sup>. However, the role of fatty acids, a product  
57 of lipolysis, in fibrosis is unclear. While fatty acids can exacerbate lung fibrosis<sup>15</sup> and  
58 systemic inhibition of lipolysis without fibrotic stimuli can modestly increase homeostatic  
59 dermal ECM<sup>16</sup>, fatty acids reduce ECM gene expression in preadipocyte 3T3 L1 cells *in*  
60 *vitro*<sup>17,18</sup>. Together, these studies illustrate the need to better understand the role of  
61 lipolysis in initiating and perpetuating fibrosis.

62  
63 One potential regulator of adipocyte biology during fibrosis is the Wnt signaling pathway.  
64 Canonical Wnt signaling through the stabilization of its transducer,  $\beta$ -catenin, drives tissue  
65 fibrosis in many organs, including skin<sup>19-21</sup>. Wnt signaling can impact multiple aspects of  
66 fibroblast biology including specification, proliferation, migration, myofibroblast formation,  
67 and ECM production<sup>22-24</sup>, all of which impact fibrosis pathogenesis. While Wnt signaling

68 can repress adipogenesis<sup>25-28</sup>, the impact of Wnt signaling on mature adipocytes during  
69 fibrosis is not known.

70

### 71 **Depletion of lipid from the dermal adipocyte layer is an early event in skin fibrosis:**

72 To explore the timing of fibrotic fat loss, skin fibrosis was induced by subcutaneous  
73 injection of bleomycin in 6-8 week old mice<sup>29</sup>. While most skin fibrosis models analyze  
74 fibrosis induction after 14-21 days, we detected ECM expansion and a 3-fold reduction in  
75 Perlipin1<sup>+</sup> (PLIN<sup>+</sup>) lipid droplet size in mature adipocytes within 5 days of bleomycin  
76 treatment (Fig. 1a, b). Lineage tracing of mature adipocytes by tamoxifen-inducible  
77 *AdiponectinCreER: mT/mG* reporter<sup>30</sup> revealed that, following bleomycin injection, GFP+  
78 adipocytes remain in the DWAT region in early stages of fibrosis development, but display  
79 smaller or absent PLIN<sup>+</sup> vesicles (Fig. 1c, Extended data Fig.S1). Examination of dermal  
80 adipocytes by electron microscopy<sup>31</sup> revealed unilocular lipid droplets in control skin  
81 whereas bleomycin-injected skin contained adipocytes with multiple smaller lipid droplets  
82 (Fig.1d). These data indicate that loss of lipid occurs during skin fibrosis onset, prompting  
83 us to confirm whether this was due to lipolysis.

84

### 85 **Inhibition of adipocyte lipolysis exacerbates skin fibrosis development:**

86 To test the functional role of adipocyte lipolysis during fibrosis development, we examined  
87 mice that specifically lack *Atgl/Pnpla2* in dermal adipocytes<sup>6,7</sup>. Deletion of *Atgl* using  
88 *Adiponectin-CreER* mice results in severe impairment of FA mobilization during  
89 starvation<sup>32</sup> and after skin injury<sup>14</sup>. We induced skin-specific *Atgl* loss with topical  
90 tamoxifen treatment<sup>14</sup> and subsequently injected mice with bleomycin subcutaneously to  
91 trigger skin fibrosis. Bleomycin-injected control (*CreER*) mice displayed reduced dermal  
92 white adipose tissue (DWAT), however, tamoxifen and bleomycin-injected *Adiponectin-*  
93 *CreER; Atgl<sup>fl/fl</sup>* mice retained their DWAT and lipid content (Fig. 2a, b, d). Electron  
94 microscopy of dermal adipocytes confirmed unilocular lipid droplets in bleomycin-injected  
95 *Adiponectin-CreER; Atgl<sup>fl/fl</sup>* (Fig. 2d). Despite retaining dermal adipocyte size and lipid  
96 storage, bleomycin-treated *Adiponectin-CreER; Atgl<sup>fl/fl</sup>* mice displayed precocious dermal  
97 thickening (Fig. 2a, b). To explore ECM remodeling in the skin of these mice, we analyzed  
98 the levels of unfolded collagen chains using fluorescent collagen hybridizing protein  
99 (CHP) in the dorsal skin<sup>33</sup> (Fig. 2c). We detected increased collagen remodeling  
100 throughout the dermis of tamoxifen and bleomycin-treated *Adiponectin-CreER; Atgl<sup>fl/fl</sup>*  
101 mice compared to bleomycin-injected control mice (Fig. 2c). Together, these data reveal  
102 that *Atgl*-dependent adipocyte lipolysis occurs in the early stages of fibrosis and that the  
103 early activation of lipolysis during skin fibrosis inhibits ECM expansion during fibrosis  
104 induction (Extended data S4.5).

105

### 106 **The lipolysis axis is stimulated by Wnt signaling in adipocytes**

107 Because Wnt/ $\beta$ -catenin signaling has a key role in fibrosis<sup>19-21,34</sup> and can impact  
108 adipocyte differentiation<sup>25-28</sup>, we analyzed whether Wnt signaling stimulates the lipolytic  
109 pathway in skin fibrosis. We induced the expression of stabilized  $\beta$ -catenin, the signal  
110 transducer of activated canonical Wnt signaling, in *Engrailed1+(En1)* dermal fibroblasts  
111 and adipocyte stem cells<sup>13,22,35</sup> using *En1Cre/+; R26rtTA/+; TetO- $\beta$ -catenin/+* ( $\beta$ -cat<sup>istab</sup>)  
112 mice (Fig 3a, Extended data Fig. S3.1, S4.3). Dietary doxycycline induced  $\beta$ -cat<sup>istab</sup>  
113 resulted in significant ECM expansion in the dermis and marked DWAT reduction within

114 10 days (Fig. 3a).  $\beta$ -cat<sup>istab</sup> throughout the dermis leads to a reduction in DWAT layer  
115 thickness (Fig. 3a) and reduced size of individual PLIN<sup>+</sup> droplets within adipocytes (Fig  
116 3b), despite sustained hair follicle growth (Extended data Fig. S4.3) and associated hair  
117 adipocyte enlargement<sup>36</sup>. Interestingly, subsequent withdrawal of doxycycline in  $\beta$ -cat<sup>istab</sup>  
118 for 3 weeks led to rescue of DWAT and dermal thickness (Fig. 3a). Thus, the depletion of  
119 lipid within mature dermal adipocytes in mouse skin fibrosis is Wnt signaling-dependent  
120 and reversible.

121  
122 Next, we examined whether activation of canonical Wnt signaling could induce adipocyte  
123 lipolysis by analyzing phosphorylation of Hormone Sensitive Lipase (pHSL) and  
124 Perilipin<sup>37</sup> and glycerol release, an end stage product specific to the lipolysis pathway  
125 (Extended data Fig. S1.1).  $\beta$ -cat<sup>istab</sup> stimulated a nearly two-fold increase in pHSL in  $\beta$ -  
126 cat<sup>istab</sup> skin after 5 days, preceding visible lipid depletion (Fig. 3c). Greater numbers of  
127 phospho-Perilipin<sup>+</sup> adipocytes were also detected (Extended data Fig. S4.3). Electron  
128 microscopy confirmed that  $\beta$ -cat<sup>istab</sup>-expressing skin had numerous small intracellular lipid  
129 droplets in DWAT adipocytes (Fig. 3d), confirming that lipid dynamics are altered upon  
130 Wnt activation. Further, treatment with the Wnt agonist CHIR99021 induced adipocyte  
131 lipid loss *in vitro*. Using Oil Red O staining to label lipid content, we observed that  
132 treatment of 3T3-L1 differentiated adipocytes and primary mouse dermal adipocytes with  
133 CHIR99021 induced loss of lipid in cultured adipocytes (Fig. 3e and Extended data S4.4).  
134 Visible lipid depletion was preceded by elevated free glycerol in media, indicating that  
135 lipolysis is induced by Wnt activation (Fig. 3e). Glycerol release was abrogated in  
136 CHIR99021 treated cells in the presence of an ATGL inhibitor, atglistatin (Fig. 3e),  
137 indicating that reduction in lipid content is due to ATGL-dependent lipolysis. Collectively,  
138 these data suggest that lipolysis is activated by Wnt signaling and drives lipid loss during  
139 the onset of skin fibrosis (Extended data S4.5).

140  
141 **Wnt-induced DPP4/CD26 is necessary for lipid depletion of dermal adipocytes.**

142 To better understand the mechanisms by which Wnt/ $\beta$ -cat signaling promotes fibrosis and  
143 adipocyte lipolysis, we analyzed the transcriptome of  $\beta$ -cat<sup>istab</sup> dermal fibroblasts (GSE  
144 103870)<sup>38</sup>. DPP4 was one of 10 most differentially expressed genes and was highly  
145 upregulated (47x,  $p \leq 0.005$ ) in  $\beta$ -cat<sup>istab</sup> dermal fibroblasts<sup>38</sup>. The expression of DPP4 was  
146 of particular interest because it is expressed in fibrotic fibroblasts<sup>13</sup> and its inhibition  
147 affects ECM accumulation in injury models<sup>35,39</sup> and only partially protects from ECM  
148 accumulation chemical models of fibrosis<sup>40</sup>, although its role in lipid handling is unknown.  
149 DPP4 immunoreactivity was increased in human systemic sclerosis (SSc) and keloids,  
150 correlating with SSc disease severity compared to control human skin (Fig. 4a and  
151 Extended data Fig. S4.1). Wnt activation induced *Dpp4* mRNA expression in  $\beta$ -cat<sup>istab</sup>  
152 fibroblasts and CHIR99021-treated mouse primary dermal adipocytes *in vitro* (Extended  
153 data Fig. S4.2). DPP4 protein is increased in  $\beta$ -cat<sup>istab</sup> dermis and DWAT *in vivo* and in  
154 bleomycin-injected skin (Fig. 4b and Extended data Fig. S4.2). After reversal from  $\beta$ -  
155 cat<sup>istab</sup>, *Dpp4* mRNA and DPP4 protein expression levels were restored to control levels  
156 *in vitro* and *in vivo*, respectively (Extended data Fig. S4.2). Together, these data  
157 demonstrate that DPP4 expression is responsive to Wnt signaling in both dermal  
158 fibroblasts and adipocytes.

159

160 Next, we tested if DPP4 inhibition (DPP4<sub>i</sub>) accelerates recovery from Wnt-induced dermal  
161 fibrosis. During early reversal caused by withdrawal of dietary doxycycline for 10 days,  $\beta$ -  
162 cat<sup>istab</sup> skin remained fibrotic and DWAT remained depleted. Treatment of  $\beta$ -cat<sup>istab</sup> skin  
163 during the first 10 days of the reversal phase with a DPP4 inhibitor, sitagliptin, accelerated  
164 the recovery of DWAT and dermal thickness (Fig. 4c). *In vitro*, sitagliptin treatment also  
165 partially rescued ORO+ lipid droplets in CHIR99021 treated mature adipocytes (Extended  
166 data Fig. S4.4). However, sitagliptin co-treatment with CHIR99021 did not fully rescue  
167 Wnt-stimulated lipolysis *in vitro*, suggesting that DPP4 function in adipocytes is also likely  
168 mediated in part by membrane bound DPP4/CD26, which is not targeted by inhibitors or  
169 additional Wnt targets are involved (Fig. 4g).

170  
171 Subsequently, we tested the hypothesis that Wnt-induced *Dpp4* expression controls  
172 adipocyte lipolysis and ECM accumulation *in vivo* by examining whether genetic deletion  
173 of *Dpp4* rescues Wnt-induced fibrosis phenotypes. First, we confirmed that Wnt signaling  
174 is activated in the dermis and DWAT of *Dpp4*<sup>-/-</sup>;  $\beta$ -cat<sup>istab</sup> mice and indeed, we detected  
175 nuclear  $\beta$ -catenin in both *Dpp4*<sup>+/+</sup> and *Dpp4*<sup>-/-</sup>;  $\beta$ -cat<sup>istab</sup> mice (Extended Data Fig. S4.3).  
176 Strikingly, *Dpp4*<sup>-/-</sup>;  $\beta$ -cat<sup>istab</sup> mice displayed a marked preservation of DWAT, increased  
177 PLIN<sup>+</sup> lipid droplet size, attenuated dermal thickening, in comparison to *Dpp4*<sup>+/+</sup>;  $\beta$ -cat<sup>istab</sup>  
178 mice (Fig. 4D and E). Collagen remodeling was significantly diminished in the DWAT and  
179 lower dermal regions in *Dpp4*<sup>-/-</sup>;  $\beta$ -cat<sup>istab</sup> (Fig. 4e, Extended Data Fig. S4.3). There was  
180 attenuated expression of p-Perilipin and electron microscopy revealed intact unilocular  
181 lipid droplets in *Dpp4*<sup>-/-</sup>;  $\beta$ -cat<sup>istab</sup> compared to *Dpp4*<sup>+/+</sup>;  $\beta$ -cat<sup>istab</sup> dermal adipocytes,  
182 demonstrating protection from lipolysis (Fig. 4e, 4f, Extended data Fig. S4.3.). Taken  
183 together, these data indicate that DPP4 is required for Wnt-induced adipocyte lipolysis  
184 and ECM expansion during fibrosis onset and DPP4<sub>i</sub> can accelerate the recovery from  
185 established Wnt-induced fibrosis. These findings resonate with recent work linking DPP4  
186 with obesity, metabolic syndrome, adipocyte dedifferentiation *in vitro*, inhibition of  
187 adipocyte differentiation *in vivo*<sup>41-43</sup>, scar formation<sup>13,35</sup>, and fibrosis<sup>39,40,44</sup>.

## 188 189 Discussion

190 By combining chemical and genetic models of skin fibrosis development with genetic and  
191 pharmacological manipulations (Fig. 4g, Extended data Fig. S4.5), our data unearth  
192 molecular mechanisms that drive adipocyte lipolysis and govern ECM homeostasis during  
193 fibrosis development. Given the presence of mature adipocytes in the heart and kidney  
194 stroma and lipofibroblasts in the lung<sup>2-5</sup>, the Wnt-Dpp4-adipocyte axis may explain the  
195 crucial role of Wnt signaling in concert with other fibrotic stimuli in fibrogenesis of the  
196 several other tissues<sup>45</sup>. Furthermore, since fatty acid metabolism<sup>46</sup>, lipid loss<sup>47,48</sup>, and  
197 fibroblast activation accompany tumor growth and metastasis<sup>35</sup>, our data may shed light  
198 on key mechanisms that impact tissue morphogenetic changes in many disease states.

199  
200 Our findings also resonate with recent reports that heterogeneous fibroblast populations  
201 express DPP4 during skin homeostasis and repair<sup>35,49,50</sup> and DPPs' peptidase activity  
202 plays a crucial role for inflammation, wound repair, and tumorigenesis<sup>13,51,52</sup>. Together,  
203 our data further demonstrate that DPP4 regulates both homeostasis of adipocyte lipid  
204 content and fibroblast ECM production to impact tissue fibrosis and promote recovery.  
205 We propose that DPP4's broad substrate repertoire including chemokines and metabolic

206 regulators may drive multiple aspects of fibrosis development and that FDA-approved  
207 DPP4 inhibitors may be useful to accelerate clinical treatments for fibrosis prevention  
208 and/or recovery.

209  
210 **Acknowledgements:** We would like to contribute all the past and present members of  
211 the Atit and Horsley labs that contributed intellectually to this work especially Sarah  
212 Ebmeier who initiated this project in the Horsley lab. We thank the CWRU Imaging Core  
213 and Yale electron microscopy core. Special thanks to Gregg DiNuoscio, David  
214 Buchner, Rodrigo Somoza-Palacios, Jixin Zhong, Meagan Kitt, Emilie Legue and Karl  
215 Liem for technical support and advice. The following support contributed to this work:  
216 Global Fibrosis Fund (R.P.A), N.I.H- NIAMS R01 AR076938 (V.H. and R.P.A), NIH-  
217 NIAMS R01 AR0695505 (V.H.), R01 AR075412, R01 (V.H.), NIH-NIDCR R01 DE18470  
218 (R.P.A), NIH-NICHD R01 HD042311 (J.P.L.), National Institutes of Arthritis  
219 Musculoskeletal and Skin Disease grants Scleroderma Center of Research Translation  
220 1P50AR060780 (R.L.), NIH T32 Musculoskeletal Predoctoral Training Grant T32 AR  
221 7505-31 (A.J.), NIH T32 Dermatology Predoctoral Training Grant T32 AR 7569-25  
222 (A.J.), NIH T32 Human Genetics and Genomics Training Grant (5T32HD007149-42)  
223 (E.C.), CWRU-SOURCE fellowship (B.Z.), and Arnold and Mabel Beckman Fellowship  
224 (SK). Schematics were made on biorender.com.

225  
226 **Author Contributions:** V.H., A.J., E.C. and R.P.A conceived the experimental plan.  
227 V.H, R.P.A, A.J., V.L. and E.C. performed the experiments, made the figures, and did the  
228 analysis. M.S., E.H-S., S.K., B.Z. and V.L. contributed to data collection. S.K. and B.Z  
229 developed and performed machine learning algorithms for quantitative image analysis.  
230 J.L, Y.Y., R. L. and S.R. contributed key mouse reagents and human samples.

231  
232 **Competing interests:** R.L. has received consulting fees from Bristol Myers  
233 Squibb, Boehringer Ingelheim, Certa, Pfizer, Magenta, Biogen and Formation, and grant  
234 support from Biogen, Formation, Moderna, Astra Zeneca, Kyowa, Kirin,  
235 and Genentech/Roche. The other authors state no conflict of interest.

236  
237 **Materials and Correspondence:** Valerie Horsley: [Valerie.horsley@yale.edu](mailto:Valerie.horsley@yale.edu) and  
238 Radhika Atit: [rpa5@case.edu](mailto:rpa5@case.edu)

239  
240  
241

## 242 References

- 243 1. Distler, J. H. W. *et al.* Shared and distinct mechanisms of fibrosis. *Nature*  
244 *Reviews Rheumatology* **15**, 705–730 (2019).
- 245 2. Agha, El, E. *et al.* Two-Way Conversion between Lipogenic and Myogenic  
246 Fibroblastic Phenotypes Marks the Progression and Resolution of Lung  
247 Fibrosis. *Cell Stem Cell* **20**, 261–273.e3 (2017).
- 248 3. Rehan, V. K. & Torday, J. S. The lung alveolar lipofibroblast: an evolutionary  
249 strategy against neonatal hyperoxic lung injury. *Antioxidants & redox*  
250 *signaling* **21**, 1893–1904 (2014).
- 251 4. Schmidt, B. A. & Horsley, V. Intradermal adipocytes mediate fibroblast  
252 recruitment during skin wound healing. *Development* **140**, 1517–1527  
253 (2013).
- 254 5. Hernandez-Gea, V. & Friedman, S. L. Pathogenesis of liver fibrosis. *Annu*  
255 *Rev Pathol* **6**, 425–456 (2011).
- 256 6. Haemmerle, G. *et al.* Defective lipolysis and altered energy metabolism in  
257 mice lacking adipose triglyceride lipase. *Science* **312**, 734–737 (2006).
- 258 7. Fischer, J. *et al.* The gene encoding adipose triglyceride lipase (PNPLA2) is  
259 mutated in neutral lipid storage disease with myopathy. *Nat Genet* **39**, 28–30  
260 (2007).
- 261 8. Zhao, X., Kwan, J. Y. Y., Yip, K., Liu, P. P. & Liu, F.-F. Targeting metabolic  
262 dysregulation for fibrosis therapy. *Nat Rev Drug Discov* **19**, 57–75 (2020).
- 263 9. Flaherty, S. E. *et al.* A lipase-independent pathway of lipid release and  
264 immune modulation by adipocytes. *Science* **363**, 989–993 (2019).
- 265 10. Cingolani, F. & Czaja, M. J. Regulation and Functions of Autophagic  
266 Lipolysis. *Trends Endocrinol. Metab.* **27**, 696–705 (2016).
- 267 11. Frühbeck, G., Méndez-Giménez, L., Fernández-Formoso, J.-A., Fernández,  
268 S. & Rodríguez, A. Regulation of adipocyte lipolysis. *Nutr Res Rev* **27**, 63–  
269 93 (2014).
- 270 12. Marangoni, R. G. *et al.* Myofibroblasts in Murine Cutaneous Fibrosis  
271 Originate From Adiponectin-Positive Intradermal Progenitors. *Arthritis &*  
272 *Rheumatology* **67**, 1062–1073 (2015).
- 273 13. Shook, B. A. *et al.* Myofibroblast proliferation and heterogeneity are  
274 supported by macrophages during skin repair. *Science* **362**, eaar2971  
275 (2018).
- 276 14. Shook, B. A. *et al.* Dermal Adipocyte Lipolysis and Myofibroblast Conversion  
277 Are Required for Efficient Skin Repair. *Cell Stem Cell* **26**, 880–895.e6  
278 (2020).
- 279 15. McManus, B. & Knight, D. Long-chain fatty acids are bad in IPF, or are they?  
280 *Respirology* **50**, 122 (2020).
- 281 16. Zhang, Z. *et al.* Dermal adipocytes contribute to the metabolic regulation of  
282 dermal fibroblasts. *Exp Dermatol* **30**, 102–111 (2021).
- 283 17. Ezure, T. & Amano, S. Negative Regulation of Dermal Fibroblasts by  
284 Enlarged Adipocytes through Release of Free Fatty Acids. *Journal of*  
285 *Investigative Dermatology* **131**, 2004–2009 (2011).

- 286 18. Zhao, X. *et al.* Metabolic regulation of dermal fibroblasts contributes to skin  
287 extracellular matrix homeostasis and fibrosis. *Nature Metabolism* 1–15  
288 (2019). doi:10.1038/s42255-018-0008-5
- 289 19. Hamburg-Shields, E., DiNuoscio, G. J., Mullin, N. K., Lafayatis, R. & Atit, R.  
290 P. Sustained  $\beta$ -catenin activity in dermal fibroblasts promotes fibrosis by up-  
291 regulating expression of extracellular matrix protein-coding genes. *J. Pathol.*  
292 **235**, 686–697 (2015).
- 293 20. Akhmetshina, A. *et al.* Activation of canonical Wnt signalling is required for  
294 TGF- $\beta$ -mediated fibrosis. *Nature Communications* **3**, 735–12 (2012).
- 295 21. Hu, H.-H., Cao, G., Wu, X.-Q., Vaziri, N. D. & Zhao, Y.-Y. Wnt signaling  
296 pathway in aging-related tissue fibrosis and therapies. *Ageing Res Rev* **60**,  
297 101063 (2020).
- 298 22. Atit, R. *et al.* Beta-catenin activation is necessary and sufficient to specify  
299 the dorsal dermal fate in the mouse. *Developmental Biology* **296**, 164–176  
300 (2006).
- 301 23. Cheon, S. S. *et al.* beta-Catenin stabilization dysregulates mesenchymal cell  
302 proliferation, motility, and invasiveness and causes aggressive fibromatosis  
303 and hyperplastic cutaneous wounds. *Proc Natl Acad Sci USA* **99**, 6973–  
304 6978 (2002).
- 305 24. Sharma, M. & Pruitt, K. Wnt Pathway: An Integral Hub for Developmental  
306 and Oncogenic Signaling Networks. *Int J Mol Sci* **21**, 8018 (2020).
- 307 25. Prestwich, T. C. & MacDougald, O. A. Wnt/beta-catenin signaling in  
308 adipogenesis and metabolism. *Current Opinion in Cell Biology* **19**, 612–617  
309 (2007).
- 310 26. Choy, L., Skillington, J., biology, R. D. T. J. O. C.2000. Roles of autocrine  
311 TGF- $\beta$  receptor and Smad signaling in adipocyte differentiation. *Journal of*  
312 *Cell Biology*  
313 **149**, 667–682 (2000).
- 314 27. Clouthier, D. E., Comerford, S. A. & Hammer, R. E. Hepatic fibrosis,  
315 glomerulosclerosis, and a lipodystrophy-like syndrome in PEPCK-TGF-beta1  
316 transgenic mice. *J. Clin. Invest.* **100**, 2697–2713 (1997).
- 317 28. Zeve, D. *et al.* Wnt signaling activation in adipose progenitors promotes  
318 insulin-independent muscle glucose uptake. *Cell Metab.* **15**, 492–504  
319 (2012).
- 320 29. Takagawa, S. *et al.* Sustained activation of fibroblast transforming growth  
321 factor-beta/Smad signaling in a murine model of scleroderma. *J Invest*  
322 *Dermatol* **121**, 41–50 (2003).
- 323 30. Rivera-Gonzalez, G. C. *et al.* Skin Adipocyte Stem Cell Self-Renewal Is  
324 Regulated by a PDGFA/AKT-Signaling Axis. *Cell Stem Cell* **19**, 738–751  
325 (2016).
- 326 31. Zwick, R. K. *et al.* Adipocyte hypertrophy and lipid dynamics underlie  
327 mammary gland remodeling after lactation. *Nature Communications* **9**, 3592  
328 (2018).
- 329 32. Zechner, R., Kienesberger, P. C., Haemmerle, G., Zimmermann, R. & Lass,  
330 A. Adipose triglyceride lipase and the lipolytic catabolism of cellular fat  
331 stores. *J. Lipid Res.* **50**, 3–21 (2009).



- 332 33. Hwang, J. *et al.* In Situ Imaging of Tissue Remodeling with Collagen  
333 Hybridizing Peptides. *ACS Nano* **11**, 9825–9835 (2017).
- 334 34. Mastrogiannaki, M. *et al.*  $\beta$ -Catenin Stabilization in Skin Fibroblasts Causes  
335 Fibrotic Lesions by Preventing Adipocyte Differentiation of the Reticular  
336 Dermis. *J Invest Dermatol* **136**, 1130–1142 (2016).
- 337 35. Rinkevich, Y. *et al.* Identification and isolation of a dermal lineage with  
338 intrinsic fibrogenic potential. *Science* **348**, aaa2151–aaa2151 (2015).
- 339 36. Festa, E. *et al.* Adipocyte lineage cells contribute to the skin stem cell niche  
340 to drive hair cycling. *Cell* **146**, 761–771 (2011).
- 341 37. McDonough, P. M. *et al.* Differential phosphorylation of perilipin 1A at the  
342 initiation of lipolysis revealed by novel monoclonal antibodies and high  
343 content analysis. *PLoS ONE* **8**, e55511 (2013).
- 344 38. Mullin, N. K. *et al.* Wnt/ $\beta$ -catenin Signaling Pathway Regulates Specific  
345 lncRNAs That Impact Dermal Fibroblasts and Skin Fibrosis. *Front Genet* **8**,  
346 183 (2017).
- 347 39. Wang, X. M. *et al.* The pro-fibrotic role of dipeptidyl peptidase 4 in carbon  
348 tetrachloride-induced experimental liver injury. *Immunol Cell Biol* **95**, 443–  
349 453 (2017).
- 350 40. Soare, A. *et al.* Dipeptidylpeptidase 4 as a Marker of Activated Fibroblasts  
351 and a Potential Target for the Treatment of Fibrosis in Systemic Sclerosis.  
352 *Arthritis Rheumatol* **72**, 137–149 (2020).
- 353 41. Lamers, D. *et al.* Dipeptidyl Peptidase 4 Is a Novel Adipokine Potentially  
354 Linking Obesity to the Metabolic Syndrome. **60**, 1917–1925 (2011).
- 355 42. Bouchard, L. *et al.* Comprehensive genetic analysis of the dipeptidyl  
356 peptidase-4 gene and cardiovascular disease risk factors in obese  
357 individuals. *Acta Diabetol* **46**, 13–21 (2009).
- 358 43. Lessard, J. *et al.* Characterization of Dedifferentiating Human Mature  
359 Adipocytes from the Visceral and Subcutaneous Fat Compartments:  
360 Fibroblast-Activation Protein Alpha and Dipeptidyl Peptidase 4 as Major  
361 Components of Matrix Remodeling. *PLoS ONE* **10**, e0122065 (2015).
- 362 44. Hu, M. S. & Longaker, M. T. Dipeptidyl Peptidase-4, Wound Healing,  
363 Scarring, and Fibrosis. *Plastic and Reconstructive Surgery* **138**, 1026–1031  
364 (2016).
- 365 45. Piersma, B., Bank, R. A. & Boersema, M. Signaling in Fibrosis: TGF- $\beta$ ,  
366 WNT, and YAP/TAZ Converge. *Front Med (Lausanne)* **2**, 59 (2015).
- 367 46. Pascual, G. *et al.* Targeting metastasis-initiating cells through the fatty acid  
368 receptor CD36. *Nature Publishing Group* 1–25 (2016).  
369 doi:10.1038/nature20791
- 370 47. Nieman, K. M. *et al.* Adipocytes promote ovarian cancer metastasis and  
371 provide energy for rapid tumor growth. *Nat Med* **17**, 1498–1503 (2011).
- 372 48. Zhang, M. *et al.* Adipocyte-Derived Lipids Mediate Melanoma Progression  
373 via FATP Proteins. *Cancer Discov* **8**, 1006–1025 (2018).
- 374 49. Tabib, T., Morse, C., Wang, T., Chen, W. & Lafyatis, R. SFRP2/DPP4 and  
375 FMO1/LSP1 Define Major Fibroblast Populations in Human Skin. *J Invest*  
376 *Dermatol* **138**, 802–810 (2018).

- 377 50. Merrick, D. *et al.* Identification of a mesenchymal progenitor cell hierarchy in  
378 adipose tissue. *Science* **364**, eaav2501–13 (2019).
- 379 51. Baticic Pucar, L., Pernjak Pugel, E., Detel, D. & Varljen, J. Involvement of  
380 DPP IV/CD26 in cutaneous wound healing process in mice. *Wound Repair*  
381 *Regen* **25**, 25–40 (2017).
- 382 52. Driskell, R. R. *et al.* Distinct fibroblast lineages determine dermal  
383 architecture in skin development and repair. *Nature* **504**, 277–281 (2013).
- 384

385  
386

## 387 **Methods:**

### 388 **Mouse handling and lines**

389 *Engrailed1Cre* (*En1Cre*)<sup>53</sup>; *Rosa26rTA-EGFP*<sup>54</sup> (Jax Stock 005572) ; *TetO-deltaN89 β-*  
390 *catenin*<sup>55</sup>; *Dpp4*<sup>-/-56</sup>; *Adiponectin Cre-ER*<sup>T2 57</sup> (Jax stock 025124); *Atgl flox*<sup>58</sup> (Jax stock  
391 024278); *Rosa26 mTmG reporter*<sup>59</sup> (Jax stock 007676) lines were genotyped as  
392 previously described. The contribution of the *En1Cre* lineage cells in the skin has been  
393 previously described<sup>13,22,35,60</sup> . For induction of *TetO-deltaN89 β-catenin-myc* tagged  
394 transgene expression in the *En1Cre;R26rTA* recombined cells, 21-day old (P21) triple  
395 transgenic mice were given 6g/kg of dietary doxycycline in rodent chow (Envigo-Harlan)  
396 and 2mg/ml doxycycline in water (Sigma) for three weeks. For induction-reversible  
397 experiments, P21 mice were first treated with dietary doxycycline until P42 and then  
398 switched to regular chow and water. At desired time points, mice were euthanized and  
399 dorsal skin was processed for frozen or paraffin sections as previously described<sup>22</sup>. For  
400 each experiment, mutants with litter-matched controls were studied. At least two to four  
401 litters were used for phenotypic analysis.

402 Lineage marking of mature adipocytes was achieved using tamoxifen inducible  
403 *Adiponectin Cre-ER; Rosa26mTmG* reporter. Topical tamoxifen of 5mg/mL in 100%  
404 ethanol is painted directly on the shaved dorsal skin two days prior to bleomycin injection.  
405 Conditional deletion of *Atgl/Pnlap2* in mature adipocytes was done in *Adiponectin Cre-*  
406 *ER; Rosa26mTmG; Atgl<sup>flox/flox</sup>* and verified as previously described<sup>14</sup> Fibrosis was induced  
407 between 6-8 weeks of age in either wild-type or *Adiponectin Cre-ER; Rosa26mTmG;*  
408 *Atgl<sup>flox/flox</sup>* males of C57Bl/6 in bred background. Littermate Cre-negative controls were  
409 used for the experiments. Mice are then given daily subcutaneous injection on their upper  
410 dorsal region with 300μg of Bleomycin Sulfate (Enzo pharmaceuticals BML-AP302-0010)  
411 in 100μL PBS for 3, 5 or 11 days. Bleomycin experiments were done on C57Bl/6 male  
412 mice to avoid confounding sexual maturity related differences<sup>61</sup>. Vials of bleomycin sulfate  
413 were checked for efficacy prior to experimental treatments. To ensure injections are  
414 located to a 0.5in x 0.5 in square, mice are placed under light isoflurane anesthesia prior  
415 to injections. 24 hours after the final injection, mice are euthanized and the dorsal skin is  
416 collected.

417  
418 Yale University and Case Western Reserve Institutional Animal Care and Use Committee  
419 approved all animal procedures in accordance with AVMA guidelines Protocol 2013-0156,  
420 approved 21 November 2014, Animal Welfare Assurance No. A3145-01 at Case Western  
421 and Protocol 11248 #A3230-01Yale University.

422 **Patient Skin samples:** Samples were obtained by performing 3 mm punch biopsies from  
423 the dorsal mid-forearm of healthy control and systemic sclerosis (SSc) human subjects  
424 after informed consent under a protocol approved by the University of Pittsburgh  
425 Institutional Review Board. Archived de-identified patient SSc skin samples with Modified  
426 Rodnan Skin score (MRSS) were obtained from Scleroderma Center of Research  
427 Translation. For human tissue immunohistochemistry, access to archived de-identified  
428 keloid tissue was in compliance with the Case Western Reserve University Institutional  
429 Review Board for Human Studies.

### 430 **Adipocyte cell culture**

431 All data were obtained from primary dermal adipocyte progenitors isolated from wild-type  
432 CD1 background P4 dorsal skin. Approximately 1cm<sup>2</sup> dorsal skin was removed, rinsed in  
433 sterile 1x phosphate buffered saline (PBS), minced, and placed in 2mg/mL collagenase  
434 (Worthington, LS004196) with 2% bovine serum albumin (BSA) (Fisher, BP1600) and  
435 incubated in a 37°C rotating incubator for 45 minutes. Digested skin was filtered through  
436 a 70µM cell strainer (cat number) and plated in 60mm tissue culture plastic plates. Cells  
437 were passaged 2-3 times when they achieved approximately 80% confluence. Adipocyte  
438 differentiation was stimulated with adipocyte induction media (AIM) (DMEM  
439 (Thermofisher, 11995065) containing glucose, pyruvate, 10% fetal bovine serum (FBS),  
440 100µM indomethacin, 1µM dexamethasone, 500µM 3-isobutyl-1-methylxanthine  
441 (IBMX), and 10µM insulin) for 8-12 days. Duplicate cultures were kept in media containing  
442 only glucose and pyruvate. Differentiated adipocytes were enriched by trypsinizing  
443 (0.25% Trypsin EDTA (Thermofisher: 25200056)) and re-plating on a 12-well plate for  
444 treatment. Some differentiated adipocytes were kept in maintenance media only (DMEM  
445 with glucose, pyruvate, FBS, and insulin), or with additives such as 7µM CHIR (Cayman,  
446 13122), 40µM atglistatin (Sigma Aldrich, SML1075-5MG), and/or 20µM sitagliptin  
447 (Cayman, 13252). All media was prepared fresh and changed every 2<sup>nd</sup> day. Following  
448 4 days of treatment, media was collected from each well and free glycerol was quantified  
449 using Free Glycerol Reagent (Sigma-Aldrich F6428-40ML). Data was plotted relative to  
450 untreated control mature adipocytes from the same mouse and analyzed using a paired  
451 *t*-test with Welch's correction. Following 8 days of treatment cells were rinsed and fixed  
452 for 1 hour in 10% neutral buffered formalin. They were then stained with Oil Red O (ORO)  
453 (Sigma Aldrich, O0625-25G) for 10 minutes and rinsed with water before they were  
454 imaged on a Leica DMI8 inverted microscope. Camera positions within wells were held  
455 constant between plates and each well was photographed in 2 non-overlapping regions.  
456 Images were then quantified using Cell Profiler<sup>TM</sup> (See below) to estimate coverage and  
457 average coverage per condition was displayed relative to untreated control cells and  
458 analyzed with a paired *t*-test with Welch's correction. Experiments were repeated on 3-4  
459 biological replicates.

460

### 461 **Histological staining and morphometrics**

462 Dorsal mouse skin from mice of various ages (p26, p32, p42, p68) was isolated, fixed in  
463 4% PFA, and equilibrated in 25% sucrose for cryosectioning. Dorsal back skin was  
464 isolated from 6-8-week-old mice. It was directly frozen in OCT for cryosectioning at 14  
465 µm. Alternatively, dorsal skin pieces were drop-fixed 10% neutral buffered formalin for 1  
466 hour at 4 degrees and then processed for paraffin sectioning at 7µm. Sections were  
467 stained with Masson's trichrome for mature Collagen I expression or hematoxylin and  
468 eosin according to standard protocols. Brightfield images were captured with an Olympus  
469 BX60 microscope and Cell Sens entry software and Zeiss AX10 scope and Zen 2.6 pro  
470 software. Dermal thickness, DWAT thickness, and adipocyte number were quantified with  
471 measurement tool in Fiji/Image J software. Data represent the average thickness in three  
472 different regions in 5-10 non-overlapping fields/mouse<sup>12,19</sup>.

473

474

475

## 476 **Immunohistochemistry and Immunofluorescence**

477 For Figures 1 and 2 and Extended Data S1.1, frozen tissue was sectioned at a thickness  
478 of 14 $\mu$ M for immunofluorescence staining. Slides were fixed for 10 minutes in 4%  
479 paraformaldehyde (PFA) prior to staining. For Figures 3 and 4 and Extended data Fig  
480 3.1, 4.1- 4.5, drop-fixed paraffin tissue was embedded and sectioned at 7 $\mu$ M. Paraffin  
481 sections were deparaffinized and washed with 1xPBS. They underwent antigen retrieval  
482 in citrate buffer (10 mM Tri-Sodium Citrate dihydrate, 0.05% Tween-20, pH 6.0) for 15  
483 minutes at 93°C in a water bath. Following 10% normal goat serum block, with 0.05%  
484 Tween-20 or 0.3% Triton for 1 hr at room-temperature, tissue was incubated with  
485 appropriate primary antibody overnight at 4°C. Primary antibodies for GFP (Abcam  
486 ab13970, 1:1000),  $\beta$ -Catenin (BD Biosciences, 1:250), myc-tag (Cell Signaling 7D10,  
487 1:50), perilipin (Abcam ab3526, 1:500; Abcam ab61682, 1:500), p-perlipin1 (Vala  
488 Sciences, 4856), and CD26/DPP4 (Abcam ab28340, R&D: AF954) were used for  
489 brightfield immunohistochemistry or immunofluorescence as previously described<sup>19,55,62</sup>.  
490 After three washes in PBST (PBS+ 0.3% Triton or 0.05% Tween), species-appropriate  
491 secondary antibodies conjugated to biotin (Vector) or Alexa-fluor (Thermo-Fisher) were  
492 used. Nuclei were counterstained with hematoxylin or DAPI (1:2,000) before mounting in  
493 Fluoroshield (Sigma). Negative controls were used to confirm antibody specificity.  
494

495 *Imaging:* Brightfield Images were takes at room temperature. Brightfield images in Figure  
496 1 and 2 were obtained using Zeiss AX 10 upright scope equipped with a digital camera  
497 (Hamamatsu, ORCA-Flash4.0) and a 10x Objective (Zeiss Plan-APOCHROMAT).  
498 Brightfield images of Masson's Trichrome staining in Figure 3 and 4 and extended data  
499 E3.1, 3.2, 3.3 were taken using a Olympus BX60 microscope with a digital camera (DP70,  
500 Olympus) with Cell Sens Entry software (Ver. 1.5, © Olympus Corporation 2011) with a  
501 4x objective (Olympus UPlanFI 4x/0.13) . Exposure was held constant between controls  
502 and experimental group. Brightfield images of Oil Red O stained cells in Fig. 3E and  
503 Extended data figure S4.4 were imaged on an inverted widefield Leica Dmi8 microscope  
504 with a digital camera and a 10x objective (HC PL FLUOTAR 40x/0.60, Dry, FWD=3.3-  
505 1.9mm).  
506

507 Immunofluorescence images in Figure 1 and 2 and extended 1.1 were obtained on the  
508 Zeiss AX 10 upright scope equipped with a digital camera (Hamamatsu, ORCA-Flash4.0)  
509 and a 20x Objective (Zeiss Plan-APOCHROMAT). Immunofluorescence images in Figure  
510 3B and 4E were imaged on an inverted confocal Leica TCS SP8 gated STED 3x  
511 microscope (DMI6000, Leica), using a 40x oil immersion objective (HC PL APO 40x/1.30  
512 NA CS2, Oil, FWD=0.24 mm) detection by PMT detector and/or hybrid detectors and  
513 Leica LAS X software. CHP images were taken at 40x magnification on an inverted  
514 widefield Leica Dmi8 microscope. Max projections were generated and assembled using  
515 Fiji/ImageJ and analyzed in Cell Profiler. Images were processed and merged using  
516 Adobe Photoshop and laid out Adobe InDesign or Illustrator.  
517

## 518 **Image treatment and analysis.**

### 519 Adipocyte perilipin+ cross-sectional area:

520 For Figure 1 and 2, 20x images on the Zeiss AX10 scope were analyzed. For Figure 3  
521 and 4, 40X confocal images were analyzed in FIJI ImageJ. With FIJI's polygon selection

522 tool, at least 50 adipocytes were counted per mouse from non-overlapping fields. The  
523 areas of these identified adipocytes were binned in a histogram generated in GraphPad  
524 Prism.

#### 525 Corrected total Perilipin fluorescence:

526 20x images of WT mice stained with Perilipin were analyzed using FIJI. The DWAT layer,  
527 which contained perilipin was outlined. The area and perilipin fluorescence intensity were  
528 measured. Three full-thickness fields of the dermis (perilipin negative) were measured for  
529 fluorescent intensity to determine the average mean background fluorescence. Corrected  
530 total fluorescence was measured as perilipin intensity - (area \* average background).  
531

#### 532 ORO Pipeline:

533 Prior to feeding a batch of 4x images through the Cell Profiler™ pipeline, an  
534 undifferentiated control ORO image was first used for white-balancing using Adobe  
535 Photoshop's image processor. The configurations of this white-balancing action were  
536 input into a white-balancing script and the full batch of images were white balanced with  
537 the script. Next, the images were loaded into Cell Profiler™ and placed through an *Image*  
538 *Math* module (Operation: Invert, Multiply the first image by: 1.5) to invert the image. The  
539 inverted images were converted into grayscale images using a *Color To Gray* module  
540 (Conversion method: Split) and split into RGB channels. Each of the 3 channels were run  
541 through a series of *Correct Illumination Calculate* and *Correct Illumination Apply*  
542 illumination correction modules. The grayscale "Green" and "Blue" channels were added  
543 together in another *Image Math* module (Operation: Add) to more clearly show the ORO-  
544 stained objects on a black background. An *Identify Primary Objects* module (Threshold  
545 smoothing scale: 1.3488, Threshold correction factor: 1.0, Lower and upper bounds on  
546 threshold: 0.0, 1.0, Size of adaptive window: 50) configured with an adaptive, 2-class  
547 Otsu thresholding method was used to detect ORO-stained objects based on intensity.  
548 Finally, a *Measure Image Area Occupied* module was used to output both the area  
549 covered by ORO-stained objects as well as the total area of the image in squared pixels.  
550

#### 551 DPP4 Pipeline (SSc):

552 Prior to feeding a batch of 4x images through the Cell Profiler™ pipeline, a human  
553 forearm-skin DPP4 control image was first white-balanced using Photoshop's image  
554 processor. The configurations of this white-balancing action were input into a white-  
555 balancing script to be used on the entire batch. These white-balanced images were  
556 loaded into Cell Profiler™. A *Crop* module was used to manually select a rectangular,  
557 representative ROI in each image. Color deconvolution was completed using an *Unmix*  
558 *Colors* module to separate the images into Hematoxylin and DAB channels. A *Reduce*  
559 *Noise* module (Size: 7, Distance: 11, Cut-off distance: 0.045) was used on the DAB  
560 channel. Unwanted objects including blood vessels and hair follicles were manually  
561 identified through an *Identify Objects Manually* module. These identified objects were  
562 transformed into a binary image via a *Convert Objects to Image* module. The area of  
563 these unwanted objects was determined and recorded by a *Measure Image Area*  
564 *Occupied* module. Using a *Mask Image* module (invert the mask: yes), a mask of the  
565 unwanted objects was applied into the original ROI rectangle. The resulting ROI, with  
566 unwanted objects masked out, was thresholded by a *Threshold* module via an adaptive,  
567

568 3-class Otsu thresholding method in which the intermediate intensity objects were  
569 classified as foreground objects (Threshold smoothing scale:0.0, Threshold correction  
570 factor: 1.15, Lower and upper bounds on threshold: 0.15 & 1.0, Size of adaptive window:  
571 50). The area of these threshold identified DPP4+ objects as well as the total ROI area  
572 recorded by a *Measure Image Area Occupied* module. These recorded area data were  
573 output by an *Export To Spreadsheet* module. The relevant total ROI area was determined  
574 by subtracting the unwanted area from the total ROI area. The area covered by DPP4+  
575 objects was divided by the relevant total ROI area to give the percent coverage of DPP4+  
576 per image.

577  
578 B-CHP pipeline: adapted from <https://onlinelibrary.wiley.com/doi/pdf/10.1111/exd.13457>  
579 40X B-CHP images were loaded into Cell Profiler. Each original image was first split into  
580 grayscale versions of its RGB channels using a *Color To Gray* module (Conversion  
581 method: Split). An *Identify Objects Manually* module was used to trace and select an ROI  
582 composed of the entire skin under the epidermis and above the panniculus carnosus. A  
583 *Convert Objects To Image* module was used to convert the ROI into a binary image. A  
584 *Closing* module (Structuring element shape, size: disk, 50) was applied to this binary ROI  
585 to fill in any gaps left by the tracing performed in *Identify Objects Manually*. Using the  
586 shape of this corrected binary ROI object, a sequence of *Morph* (performed operation:  
587 distance) and *Image Math* modules are used to generate an intensity-based distance map  
588 of the ROI based on distance from the epidermis. *Rescale Intensity* (Rescaling method:  
589 Divide each image by the same value) modules then established how far down  
590 subsequent layering modules would extend. Divisor values for *Rescale Intensity* modules  
591 were changed for each image to the maximum thickness (pixel length) from the epidermis  
592 to the panniculus carnosus. Using the epidermis distance map, *Threshold* modules  
593 (Threshold strategy: global, thresholding method: manual, Threshold smoothing scale: 1,  
594 Manual Threshold: increased from 0 to 1 in 0.05 increments), established binary regions  
595 of increasing distance from the epidermis. *Image Math* modules (Operation: subtract)  
596 were then used to subtract each thresholded binary region from the preceding region to  
597 establish preliminary layers. This generated 20 preliminary layers spanning the ROI.  
598 *Erode Image* modules (Structuring element shape, size: square, 10) were used to slightly  
599 shrink each layer and ensure no overlap. An *Image Math* module (Operation: add) was  
600 used to add eroded layers to produce a full map of the layers. A sequence of identification  
601 and conversion modules was used to produce a binary image containing the area  
602 occupied by the layers. Using an *Identify Objects Manually* layer, hair follicles and all area  
603 including and under the *panniculus carnosus* were selected from the original B-CHP  
604 image. Using a sequence of *Mask Image* and *Mask Objects* modules, these unwanted  
605 objects were masked out of the binary image containing the area occupied by the layers.  
606 This new masked binary image was composed of the area defined by the layers minus  
607 the area of the unwanted objects. The new binary image was converted back into objects  
608 using a *Convert Image To Objects* module. These objects were masked over the original  
609 layers objects to generate the final map of the layers excluding unwanted areas. The red  
610 intensity from the original red channel was then calculated per final layer using a *Measure*  
611 *Object Intensity* module. A *Measure Object Size Shape* module was used to calculate the  
612 area of each final layer. The final layers were then overlaid on the original image to ensure  
613 correct functioning of the pipeline. The results were output using an *Export To*  
614 *Spreadsheet* module.

## 615 **Transmission Electron Microscopy analysis**

616 Mice were anesthetized with ketamine and xylazine prior to perfusion. Mice were fixed  
617 by transcardial perfusion with 4% PFA according to standard protocols<sup>31,63</sup>. Samples  
618 were then submitted to the Yale EM core for processing and imaged as previously  
619 described<sup>31</sup>. Briefly, hardened blocks were cut using an ultramicrotome (UltraCut UC7;  
620 Leica). Ultrathin 60-nm sections were collected and stained using 2% uranyl acetate and  
621 lead citrate for transmission microscopy. Carbon-coated grids were viewed on a  
622 transmission electron microscope (Tecnai BioTWIN; FEI) at 80 kV. Images were taken  
623 using a CCD camera (Morada; Olympus) and iTEM (Olympus) software.  
624

## 625 **RNA extraction, and qRT-PCR analysis**

626 Total RNA was extracted from cultured cells using Trizol reagent (Thermo Fisher:  
627 15596026) and processed for qRT-PCR analysis with 4ng of cDNA as previously  
628 described {Hamburg-Shields:2015kd}. *Axin2* and *Dpp4* mRNA quantities were measured  
629 relative to *Hprt* using Taqman master mix (Thermofisher, 4304437) and probes  
630 (Thermofisher, Mm00443610\_m1, Mm00494549\_m1, Mm03024075\_m1). Relative  
631 mRNA quantities were determined using an Applied Biosystems 3 PCR  
632 System. All samples were normalized to *Hprt* gene expression, and results are expressed  
633 as the fold change of Ct values relative to controls, using the  $2^{-\Delta\Delta Ct}$  formula. Complete  
634 qRT-PCR data was depicted in univariate scatter plots as recently described<sup>64</sup>. Statistical  
635 significance was determined by two-tailed, unpaired Student *t*-test with Welch's correction  
636 in GraphPad Prism software.  
637

## 638 **Western Blot analysis**

639 Western blot was performed on flash frozen dorsal mouse skin samples. Samples were  
640 mechanically dismembrated, suspended in 1xRIPA buffer (Cell Signaling 9806S) and  
641 sonicated. 10-30 $\mu$ g protein was loaded per well. When stain free gel was used (pHSL  
642 blot), it was activated prior to transfer to PVDF membrane and total protein was detected  
643 before primary antibody incubation. Otherwise transfer to PVDF was performed without  
644 activation or total protein detection (DPP4 blot). Blots were incubated in 5% milk and 3%  
645 BSA block respectively for 1 hour at room temperature followed by incubation with  $\alpha$ -  
646 DPP4 (R&D: AF954) or  $\alpha$ -phospho-HSL (Cell signaling: 4139) primary antibody overnight  
647 at 4°C followed by species appropriate secondary antibody. Protein from stain-free blots  
648 (pHSL) were visualized on a Bio-Rad Chemidoc<sup>TM</sup> gel imager and data was graphed  
649 relative to total lane protein calculated in Image Lab software. Otherwise (DPP4), blot  
650 was developed on film, stripped, and re-probed with GAPDH loading control.  
651 Densitometry was calculated in Fiji and graphed relative to GAPDH loading control.  
652

## 653 **Statistical analysis**

654 Sample size was determined based on published studies and no statistical method was  
655 employed. The experiments were not randomized. Due to the nature of the genetic  
656 manipulations, the authors were not blinded to allocation of animals for the experiments.  
657 The authors were blinded during results of the analyses. Individual data points on graphs  
658 represent the average value per mouse of 2-12 biological replicates (depending on  
659 measurement). Normality in the spread of data for each experiment was tested using  
660 Shapiro-Wilk test in GraphPad Prism software. Significance values for data sets



661 displaying normal distributions were calculated by unpaired Student *t*-test (two-tailed,  
662 unequal variances) with Welch's correction in Prism software. Additionally, one-way  
663 analysis of variance (ANOVA) was performed on Prism to compare dermal and DWAT  
664 thickness between PBS control, BLM-Cre<sup>-</sup> control and BLM *Atg1<sup>fl/fl</sup>*. Paired *t*-tests are  
665 performed where appropriate (*in vitro* only). Significance for non-normal distributed data  
666 were calculated using the Mann-Whitney *U*-Test in Prism software. For graphs with  
667 individual data points, each point represents the average of one mouse. Error bars  
668 represent standard error. All *p* values are included on the graphs and *p* values less than  
669 0.05 are considered statistically significant.

670  
671 **Data availability:** The data sets analyzed during the current study are available in the  
672 GEO repository (GSE 103870).

673

#### 674 **References for Methods section only**

- 675 53. Kimmel, R. A. *et al.* Two lineage boundaries coordinate vertebrate apical  
676 ectodermal ridge formation. *Genes & Development* **14**, 1377–1389 (2000).
- 677 54. Belteki, G. *et al.* Conditional and inducible transgene expression in mice  
678 through the combinatorial use of Cre-mediated recombination and  
679 tetracycline induction. *Nucleic Acids Research* **33**, 1–10 (2005).
- 680 55. Mukherjee, A. *et al.* A mouse transgenic approach to induce  $\beta$ -catenin  
681 signaling in a temporally controlled manner. *Transgenic Res* **20**, 827–840  
682 (2010).
- 683 56. Marguet, D. *et al.* Enhanced insulin secretion and improved glucose  
684 tolerance in mice lacking CD26. *Proc Natl Acad Sci USA* **97**, 6874–6879  
685 (2000).
- 686 57. Sassmann, A., Offermanns, S. & Wettschureck, N. Tamoxifen-inducible Cre-  
687 mediated recombination in adipocytes. *genesis* **48**, 618–625 (2010).
- 688 58. Sitnick, M. T. *et al.* Skeletal muscle triacylglycerol hydrolysis does not  
689 influence metabolic complications of obesity. *Diabetes* **62**, 3350–3361  
690 (2013).
- 691 59. Muzumdar, M. D., Tasic, B., Miyamichi, K., Li, L. & Luo, L. A global double-  
692 fluorescent Cre reporter mouse. *genesis* **45**, 593–605 (2007).
- 693 60. Jiang, D. *et al.* Two succeeding fibroblastic lineages drive dermal  
694 development and the transition from regeneration to scarring. *Nat Cell Biol*  
695 **20**, 422–431 (2018).
- 696 61. Azzi, L., El-Alfy, M., Martel, C. & Labrie, F. Gender differences in mouse skin  
697 morphology and specific effects of sex steroids and  
698 dehydroepiandrosterone. *J Invest Dermatol* **124**, 22–27 (2005).
- 699 62. Myung, P. S., Takeo, M., Ito, M. & Atit, R. P. Epithelial Wnt Ligand Secretion  
700 Is Required for Adult Hair Follicle Growth and Regeneration. *Journal of*  
701 *Investigative Dermatology* **133**, 31–41 (2012).
- 702 63. Xu, X. *et al.* Obesity activates a program of lysosomal-dependent lipid  
703 metabolism in adipose tissue macrophages independently of classic  
704 activation. *Cell Metab.* **18**, 816–830 (2013).

- 705 64. Weissgerber, T. L., Milic, N. M., Winham, S. J. & Garovic, V. D. Beyond Bar  
706 and Line Graphs: Time for a New Data Presentation Paradigm. *Plos Biol* **13**,  
707 e1002128 (2015).  
708  
709

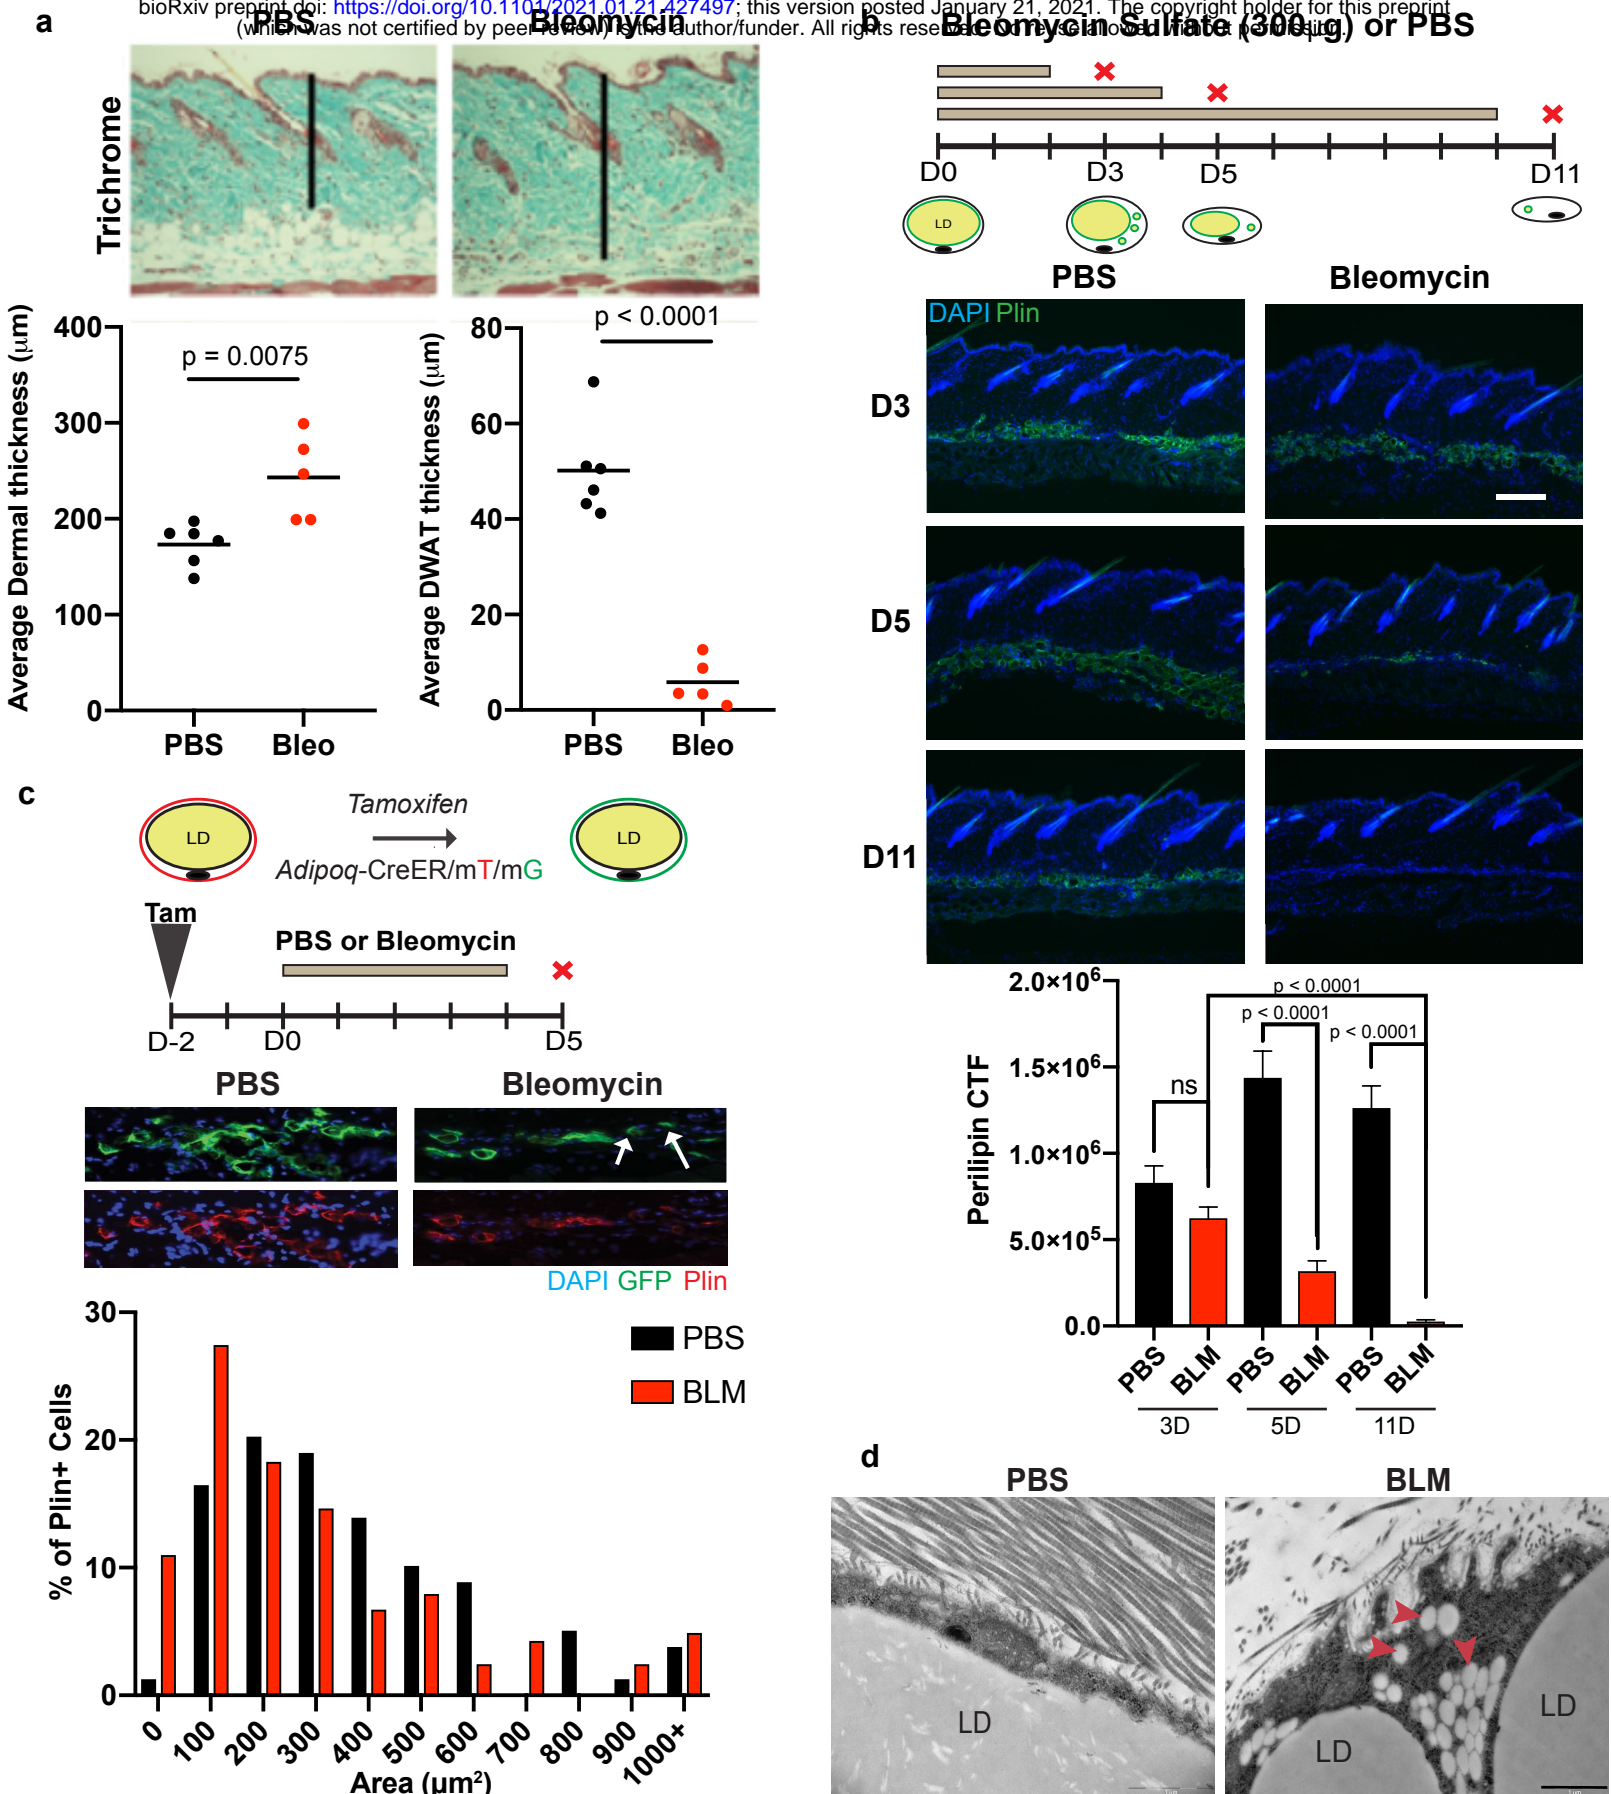

**Fig. 1: Adipocytes shrink during fibrosis development**

**a**, Trichrome stained skin sections of WT mice treated with vehicle (PBS) or bleomycin sulfate (BLM) after 5 days. Quantification of dermal and dermal white adipose tissue (DWAT) thickness in these mice.  $n=5-6$  mice for each treatment. **b**, Representative images of perilipin (green) immunofluorescent staining of skin sections from WT mice treated with PBS or BLM for indicated days. Scale bar=200 $\mu\text{m}$ . Corrected total fluorescence (CTF) of perilipin immunostaining intensity during time course.  $n= 2-3$  mice per bar. **c**, Genetic lineage tracing of dermal adipocytes in Adiponectin CreER; mTmG mice after 5 days of PBS or BLM treatment. Arrows indicate adipocytes lacking perilipin+ lipid droplets. Histogram of adipocyte size in mice treated with PBS or BLM treatment compared to PBS. **d**, Representative transmission electron microscopy (TEM) images of dermal adipocytes in PBS- and BLM-treated WT mice. LD=adipocyte lipid droplet. Arrowheads indicate lipid vesicles. Scale bar=1 $\mu\text{m}$ .

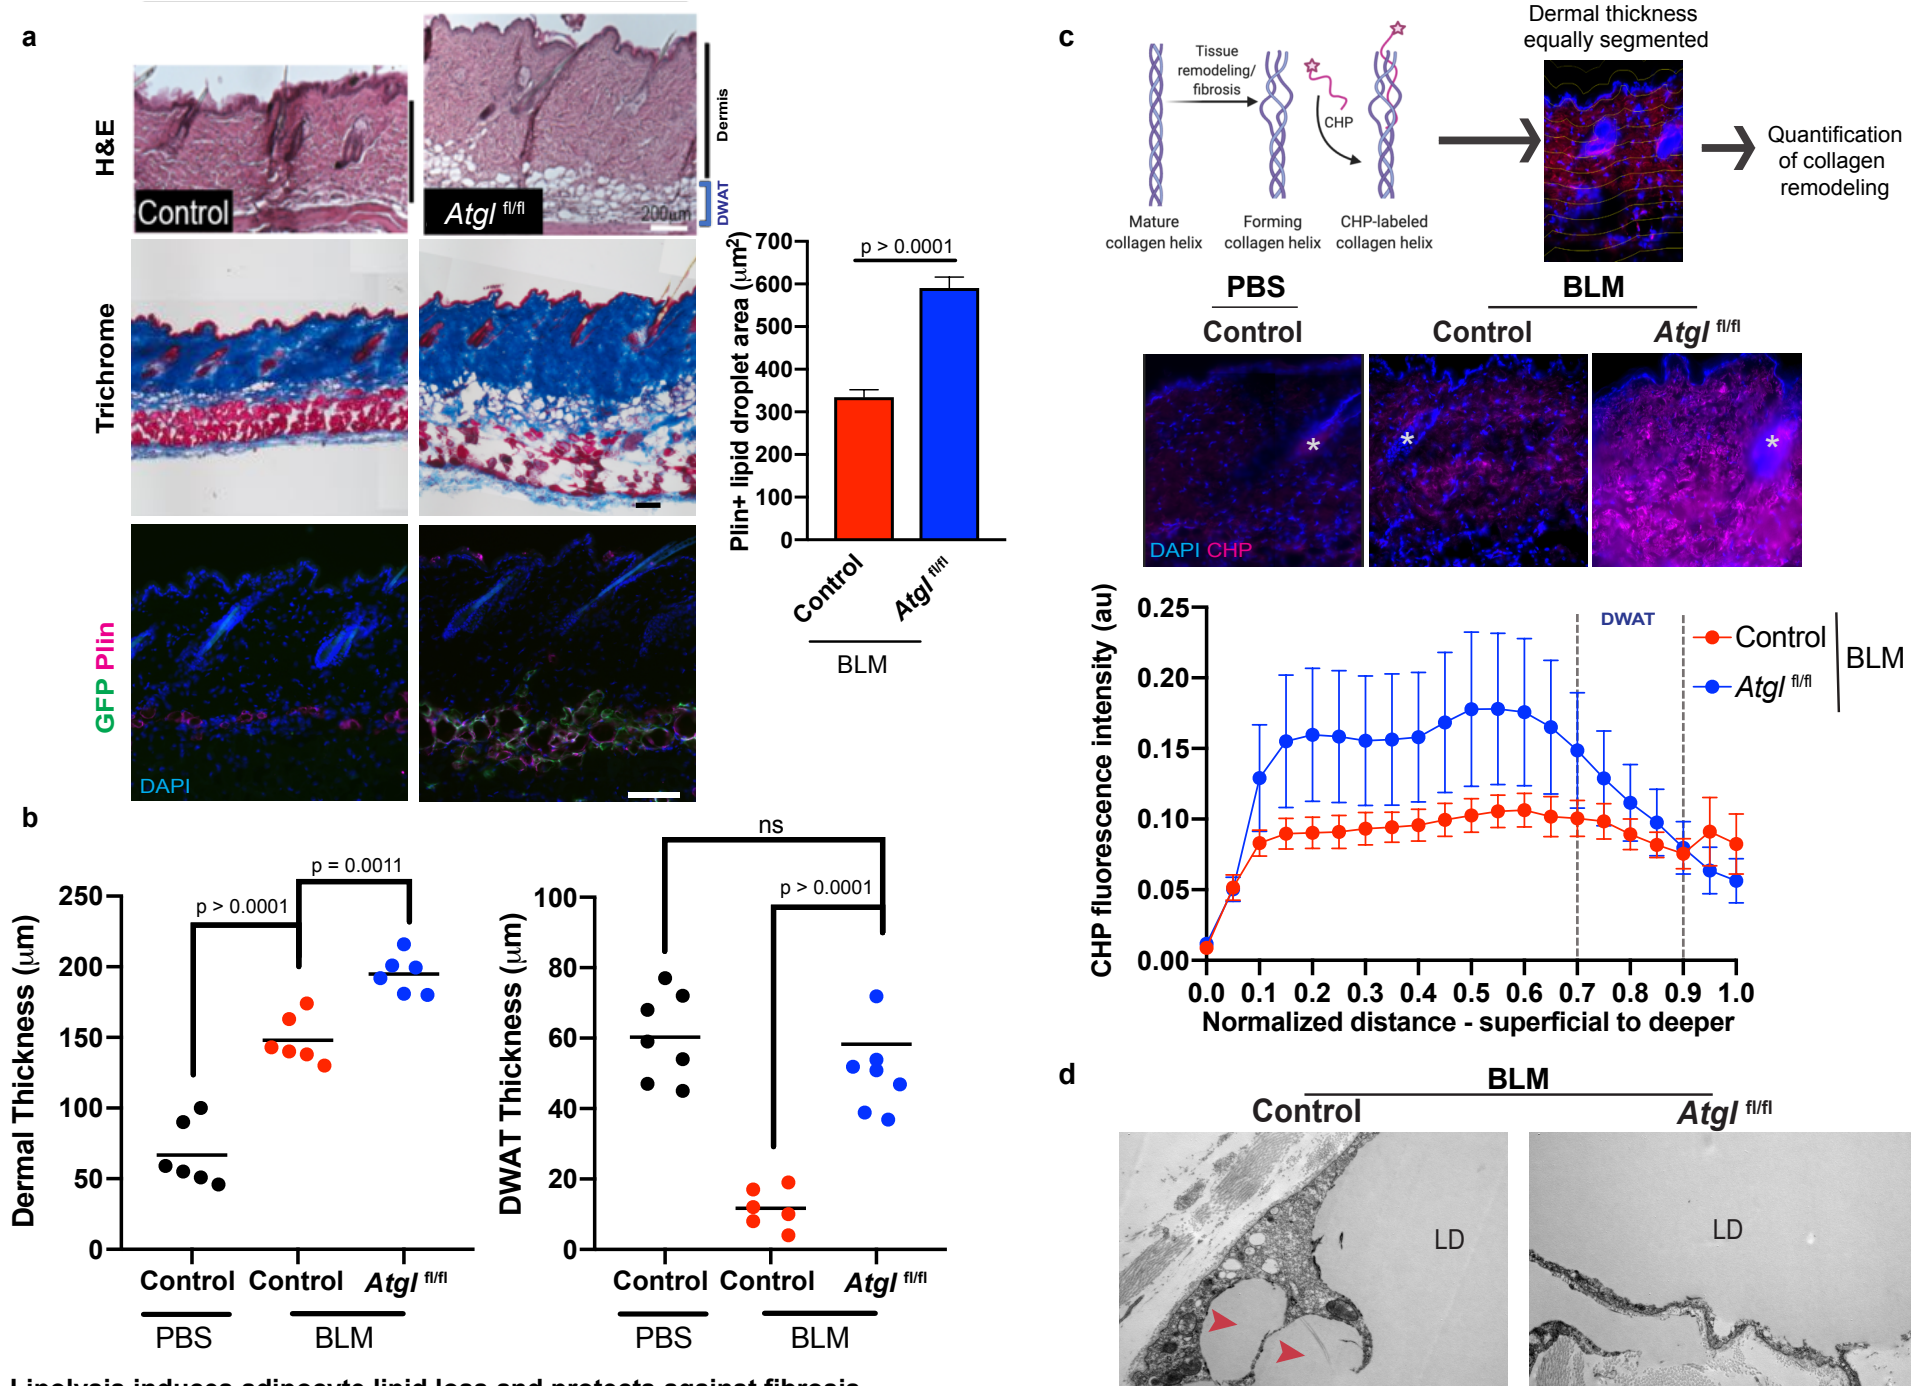

**Fig. 2: Lipolysis induces adipocyte lipid loss and protects against fibrosis**

**a**, Representative images and quantification of skin sections from control (Cre-) and Adiponectin CreER; mTmG; *Atgl*<sup>fl/fl</sup> (*Atgl*<sup>fl/fl</sup>) mice after 5 days of control or bleomycin (BLM) treatment stained with indicated dyes (Scale bar=200µm) or perilipin immunostaining (Scale bar=100µm). Quantification of Perilipin+ (PLIN+) lipid droplets in control and *Atgl*<sup>fl/fl</sup> mice. n = 5-7 mice for each genotype. **b**, Quantification of dermal and dermal white adipose tissue (DWAT) thickness in skin sections of control mice treated with PBS or BLM and *Atgl*<sup>fl/fl</sup> mice treated with BLM. n=5-7 mice per genotype and treatment. **c**, Schematic of pipeline for analysis of collagen remodeling in skin sections. Representative images and quantification of collagen hybridizing peptide (CHP) fluorescent labelling of indicated genotypes and 5 days of control or BLM treatment. n= 3 mice for each treatment. **d**, Representative TEM images of dermal adipocytes from BLM injected control and *Atgl*<sup>fl/fl</sup> mice. LD=adipocyte lipid droplet. Arrowheads indicate lipid vesicles. Scale bar=2µm.

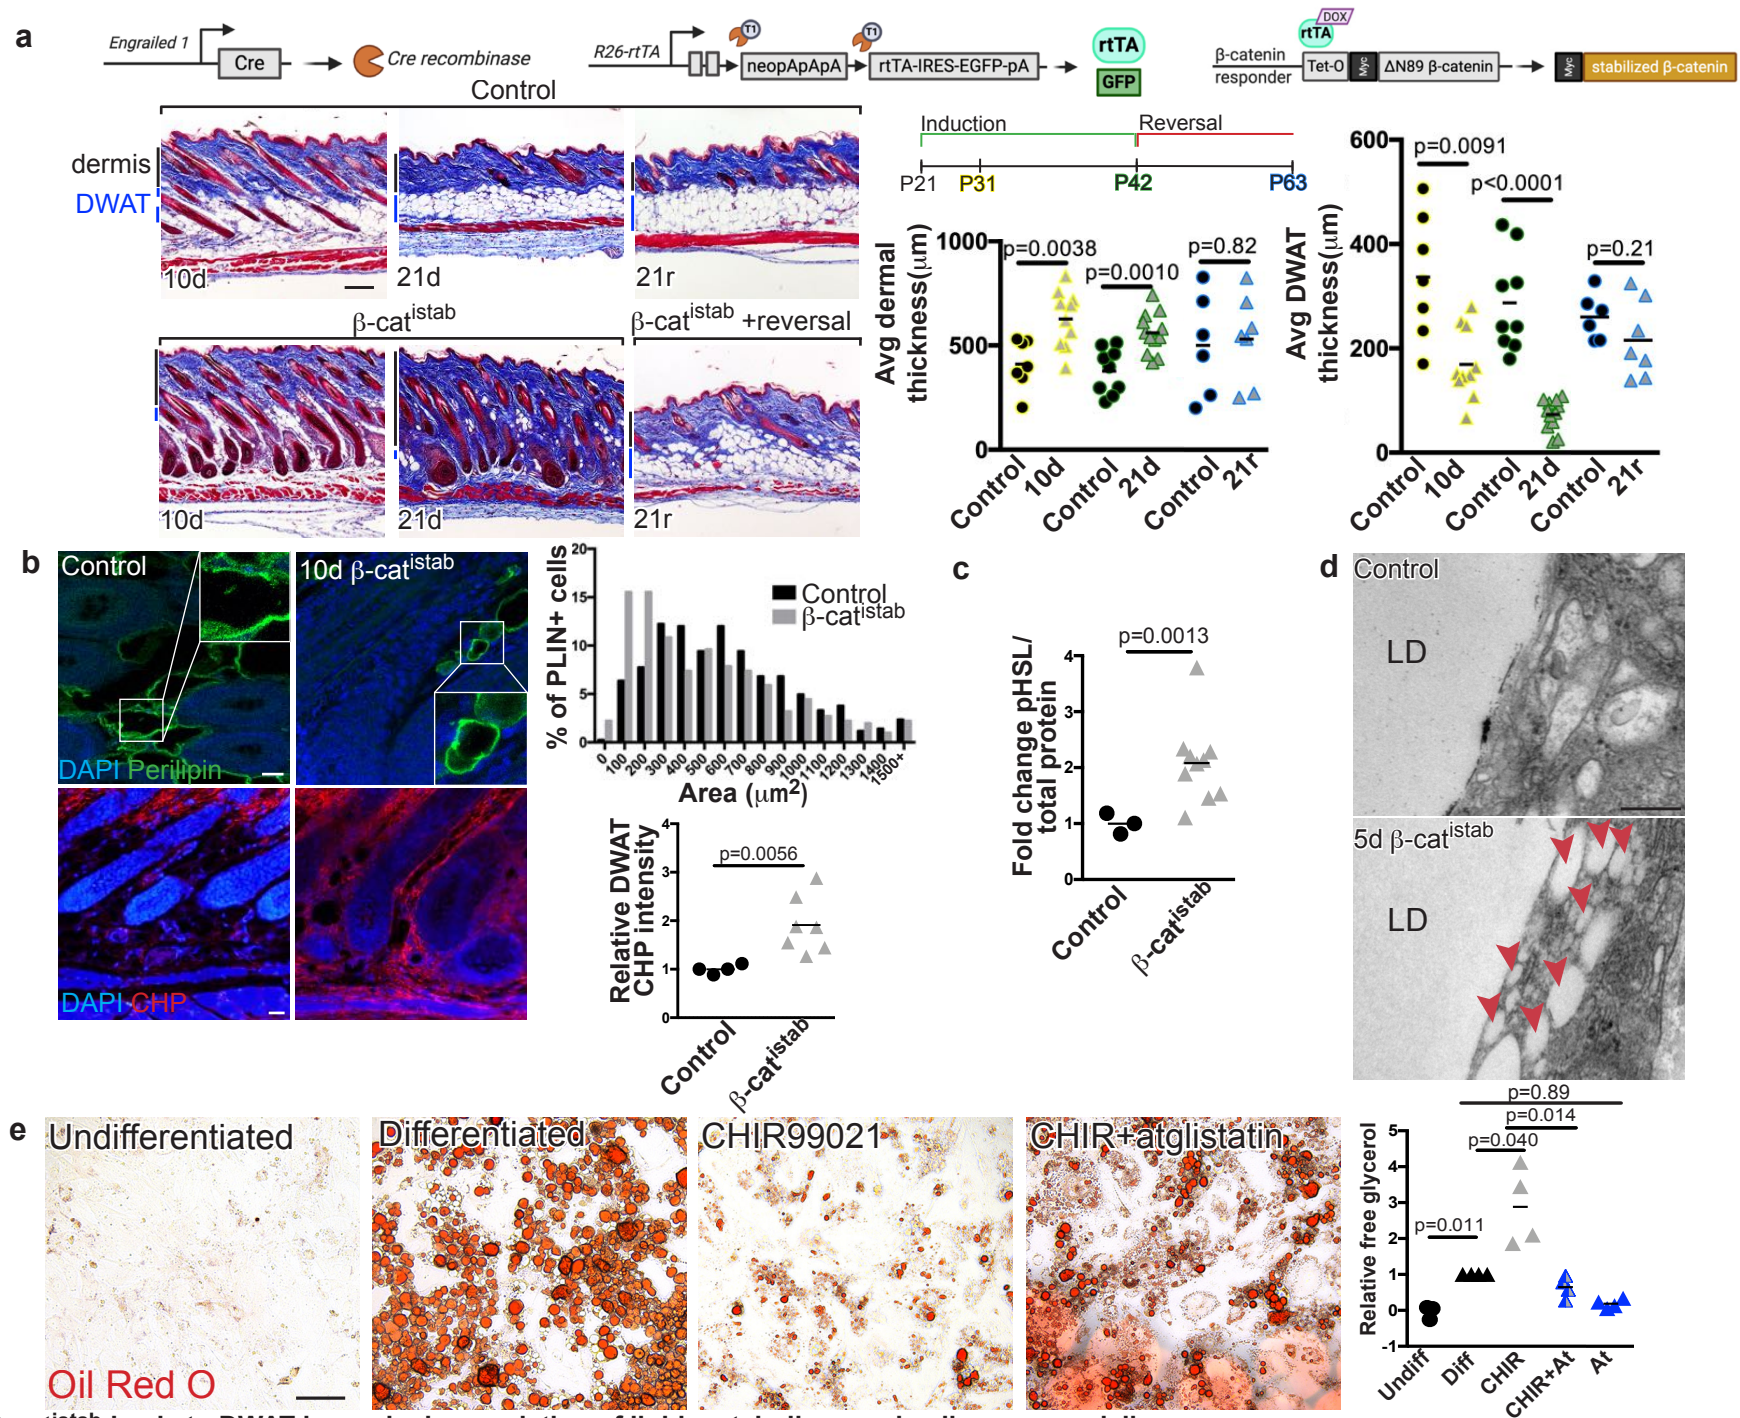

**Fig. 3:  $\beta$ -cat<sup>istab</sup> leads to DWAT loss, via dysregulation of lipid metabolism, and collagen remodeling.**

**a**, Transgenes in doxycycline-inducible/reversible  $\beta$ -catenin ( $\beta$ -cat<sup>istab</sup>) dermal fibrosis model. Fibrosis progression in Masson's trichrome stained control (top) and  $\beta$ -cat<sup>istab</sup> (bottom) dermis. Black and blue bars indicate dermal and DWAT thickness with quantification of average dorsal dermal and DWAT thickness/mouse. Scale bar=200 $\mu$ m (n=6-11). **b**, Indirect immunofluorescence of PLIN (green) and CHP stain (red) in control and 10d  $\beta$ -cat<sup>istab</sup> DWAT. Quantification of area of PLIN+ vesicles, 50/mouse (n=9). Relative corrected fluorescence CHP intensity in DWAT. Scale bar=25 $\mu$ m. **c**, Quantification of western blot for pHSL in control and 5d  $\beta$ -cat<sup>istab</sup> mouse skin relative to total protein (n=3-10). **d**, TEM images of control and 5d  $\beta$ -cat<sup>istab</sup> DWAT adipocytes. LD=large lipid droplet. Arrowheads=lipid vesicles. Scale bar=200nm. **e**, Primary mouse intradermal adipocyte progenitors untreated (Undifferentiated), treated with adipocyte induction media for 10d and subsequently with maintenance media (Differentiated) Wnt agonist (CHIR99021), or with CHIR99021 and ATGL inhibitor (atglistatin). Scale bar=200 $\mu$ m. Quantification of free glycerol between days 2 and 4 of treatment (n=4).

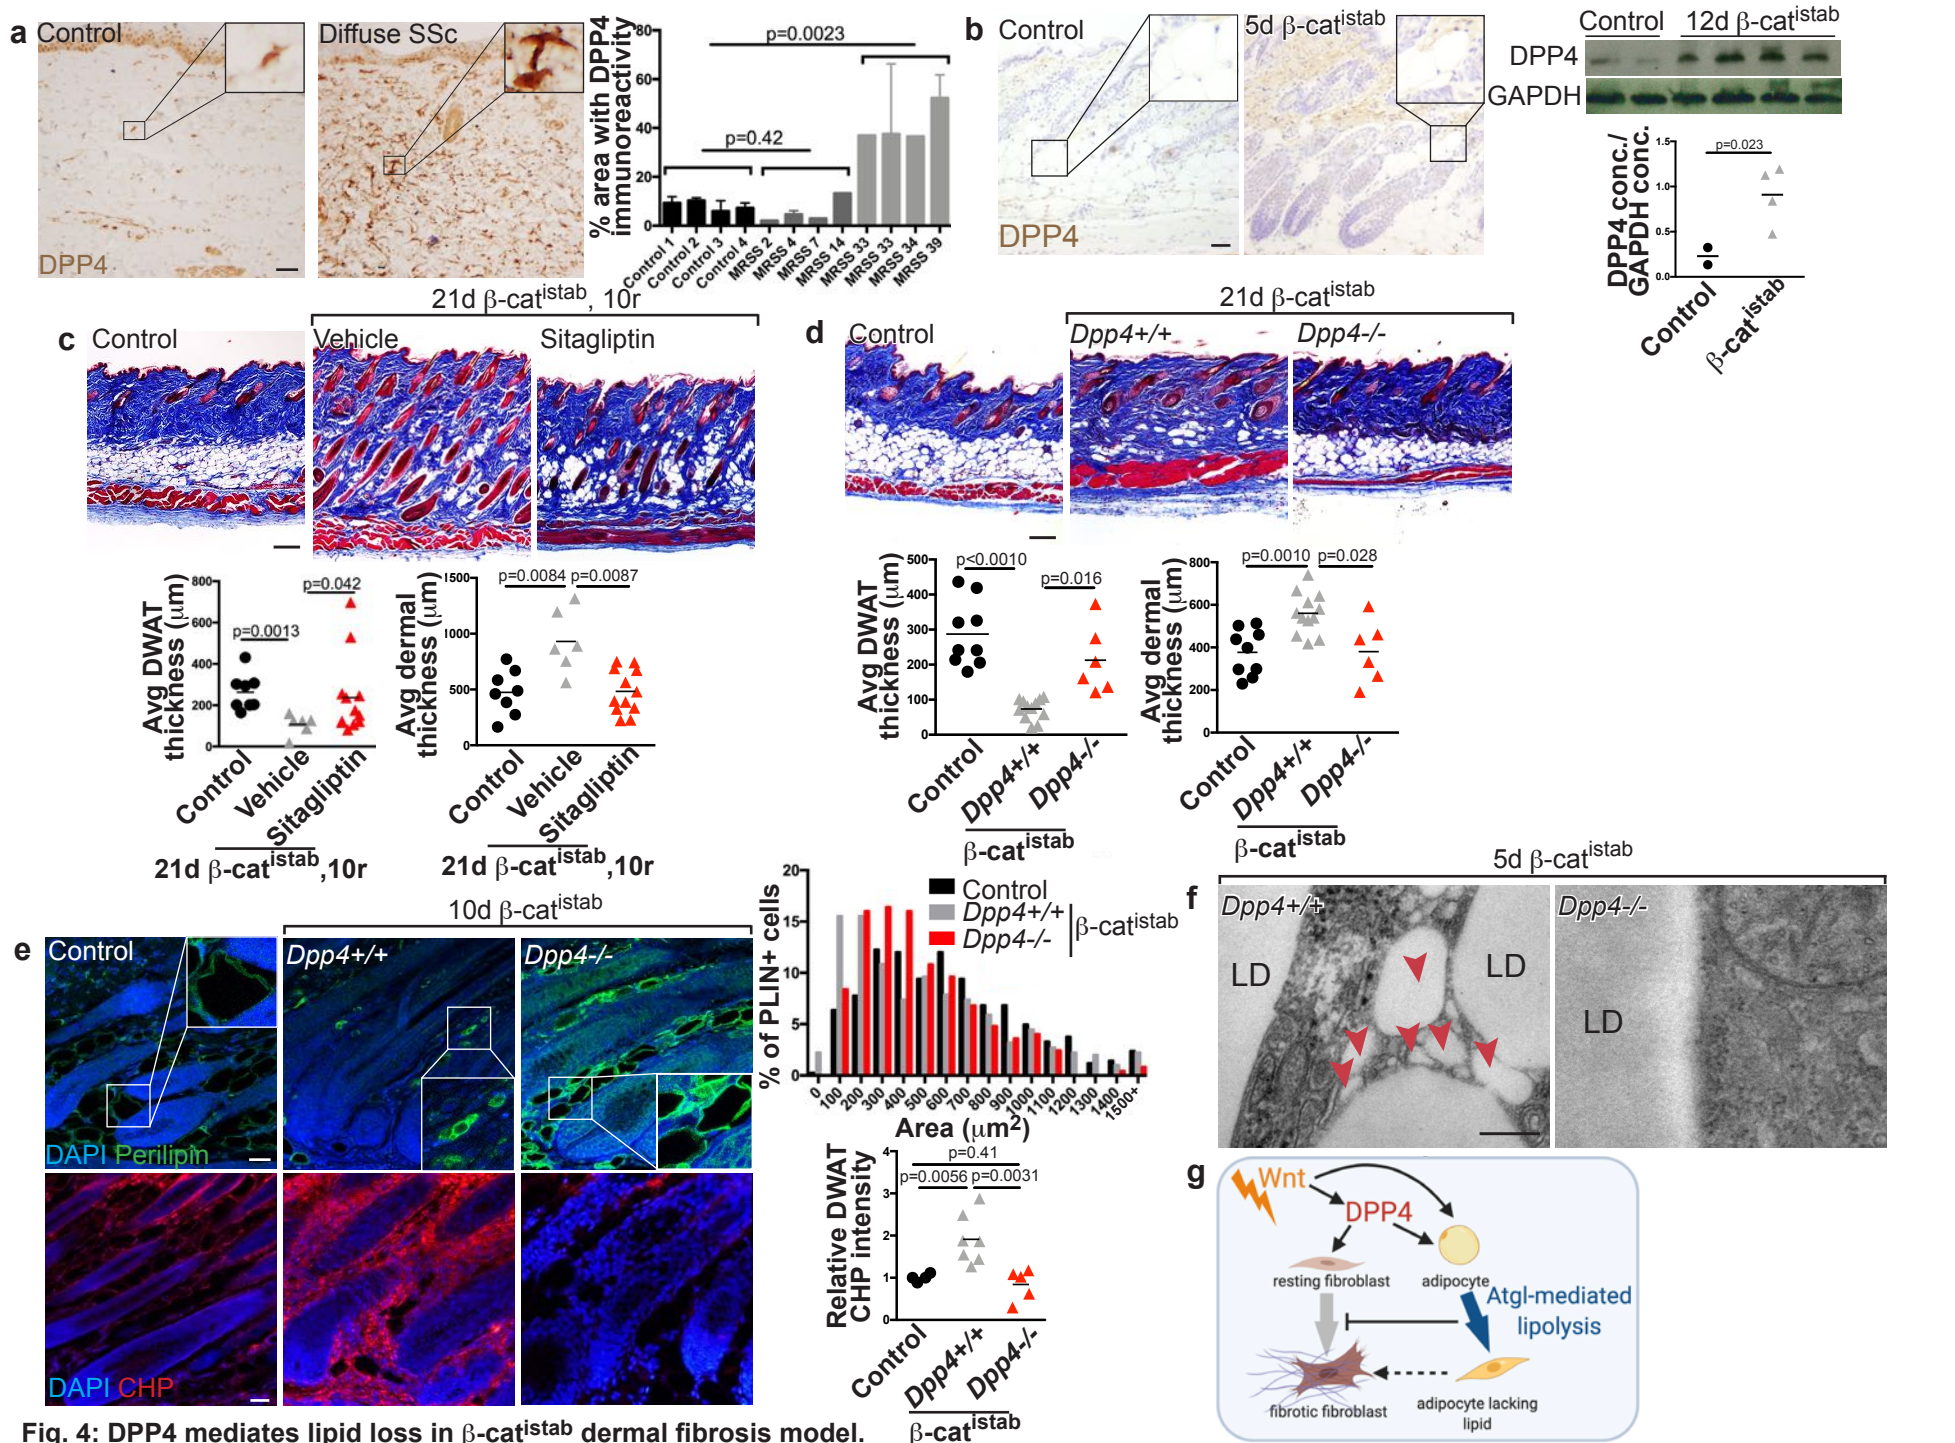

**Fig. 4: DPP4 mediates lipid loss in  $\beta$ -cat<sup>istab</sup> dermal fibrosis model.**

**a**, DPP4 immunohistochemical staining of control and SSc human forearm skin. Scale bar=100 $\mu$ m. Accompanying quantification. **b**, DPP4 immunohistochemical staining on control and 5d  $\beta$ -cat<sup>istab</sup> mouse skin. DPP4 protein expression relative to GAPDH protein quantity by western blot. Scale bar=100 $\mu$ m. **c**, Masson's trichrome stained mouse skin from control, 21d  $\beta$ -cat<sup>istab</sup> and 10d reversal with vehicle or sitagliptin treatment. Scale bar= 200 $\mu$ m. Quantification of dermal and DWAT thickness/mouse (n= 5-12). **d**, Masson's trichrome stained dorsal skin of control, 21d  $\beta$ -cat<sup>istab</sup>, and *Dpp4*<sup>-/-</sup> 21d  $\beta$ -cat<sup>istab</sup> mice. Quantification of dermal and DWAT thickness/mouse (n= 6-10). Scale bar= 200 $\mu$ m. **e**, Indirect immunofluorescence staining for PLIN+ vesicle size (n=6-9) and DWAT CHP intensity measurement relative to control. Scale bar= 25 $\mu$ m. **f**, TEM images of DWAT adipocytes in *Dpp4*<sup>+/+</sup> 5d  $\beta$ -cat<sup>istab</sup> and in *Dpp4*<sup>-/-</sup> 5d  $\beta$ -cat<sup>istab</sup>. LD=large lipid droplet. Arrowheads= lipid vesicles. Scale bar =200nm. **g**, Working model.
